# Supplementary material
Source: PubMed Central journal article supplement (PMC7329614)

**Supplem Table 1. Immunoprofile and Molecular Findings of rare BCOR variant fusions *KMT2D-BCOR* and *BCOR-CHD9* in undifferentiated round and spindle cell sarcomas.**

| Age/Sex | Site    | Fusion genes (exon)*                                                     | <i>BCOR</i><br>FISH | <i>NTRK3</i><br>mRNA up-<br>regulation | Immunohistochemistry |             |              |          |      |
|---------|---------|--------------------------------------------------------------------------|---------------------|----------------------------------------|----------------------|-------------|--------------|----------|------|
|         |         |                                                                          |                     |                                        | Pan-Trk              | <i>BCOR</i> | <i>NTRK1</i> | H3K27me3 | TLE1 |
| 38/M    | scapula | <i>KMT2D</i> (39)- <i>BCOR</i> (6)<br><i>BCOR</i> (4)- <i>KMT2D</i> (22) | –                   | +                                      | + (95%,<br>strong)   | +           | –            | Loss     | +    |
| 10/F    | pelvic  | <i>KMT2D</i> (42)- <i>BCOR</i> (4)<br><i>BCOR</i> (1)- <i>KMT2D</i> (29) | –                   | +                                      | + (60%,<br>moderate) | +           | –            | NA       | +    |
| 41/F    | kidney  | <i>BCOR</i> (1)- <i>CHD9</i> (2)<br><i>CHD9</i> (2)- <i>BCOR</i> (4)     | +                   | +                                      | + (100%,<br>strong)  | –           | –            | Loss     | NA   |

\*The most abundant exon compositions are shown for fusion transcripts with multiple different fusion junctions. NA, not available.

**Supplementary Figure 1.** No *NTRK1* (A-B) or *NTRK2* (C-D) up-regulation was observed in BCOR family tumors in both platforms (A&C, whole transcriptome sequencing; B&D, targeted RNA sequencing) (expression levels in RPKM).

**A**

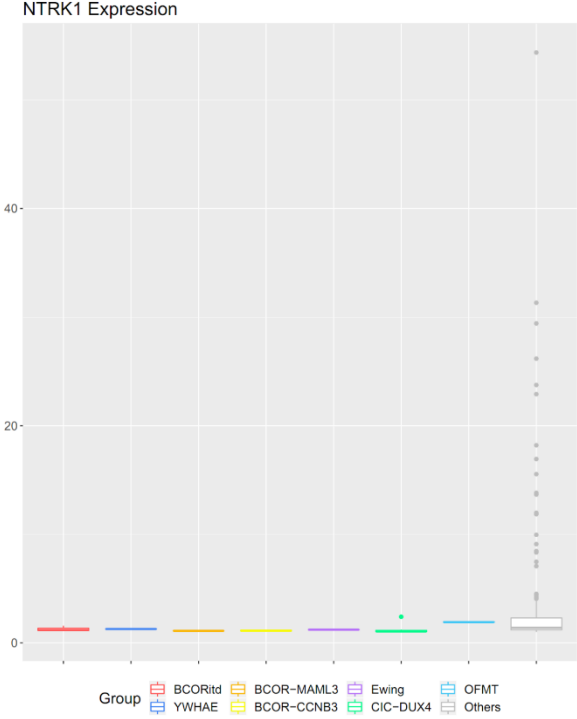

**B**

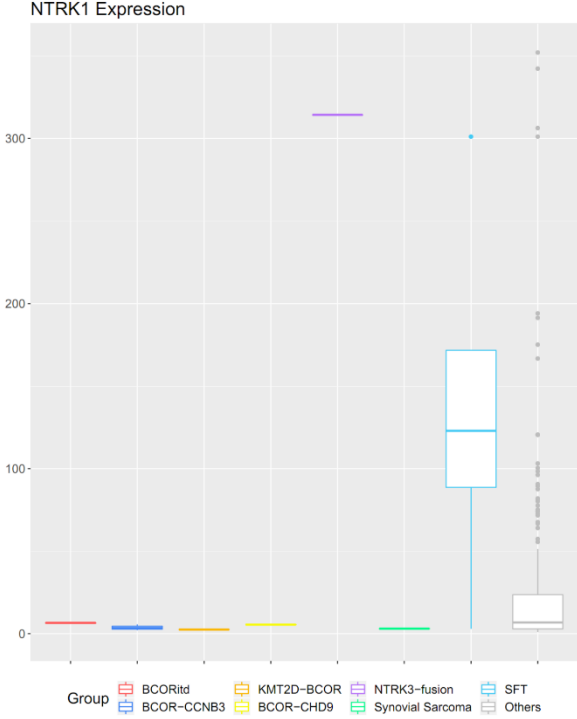

**C**

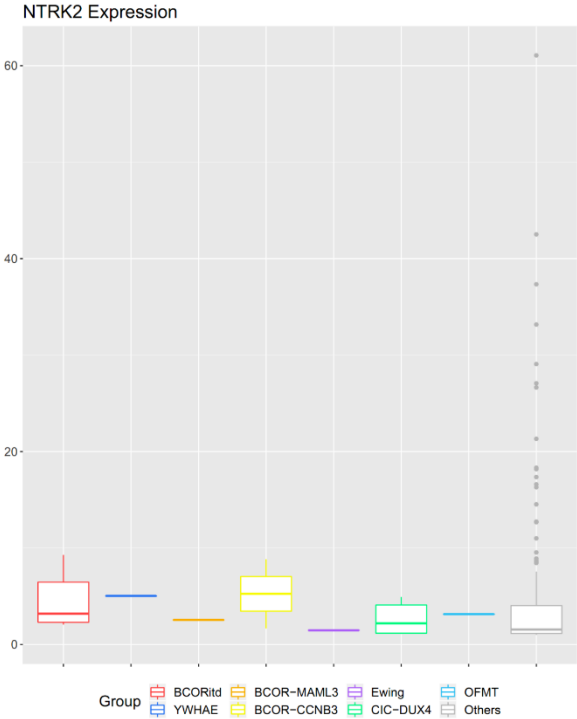

**D**

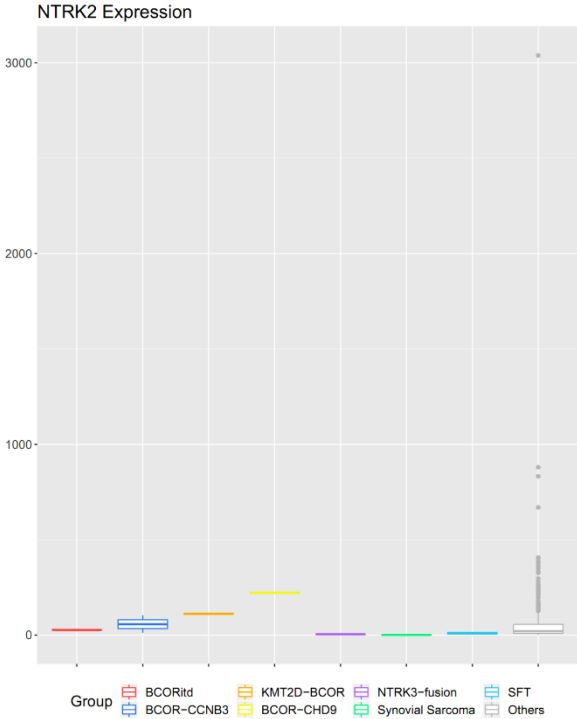

**Supplementary Figure 2.** Solitary fibrous tumors showed diffuse and strong NTRK1 immunoreactivity.

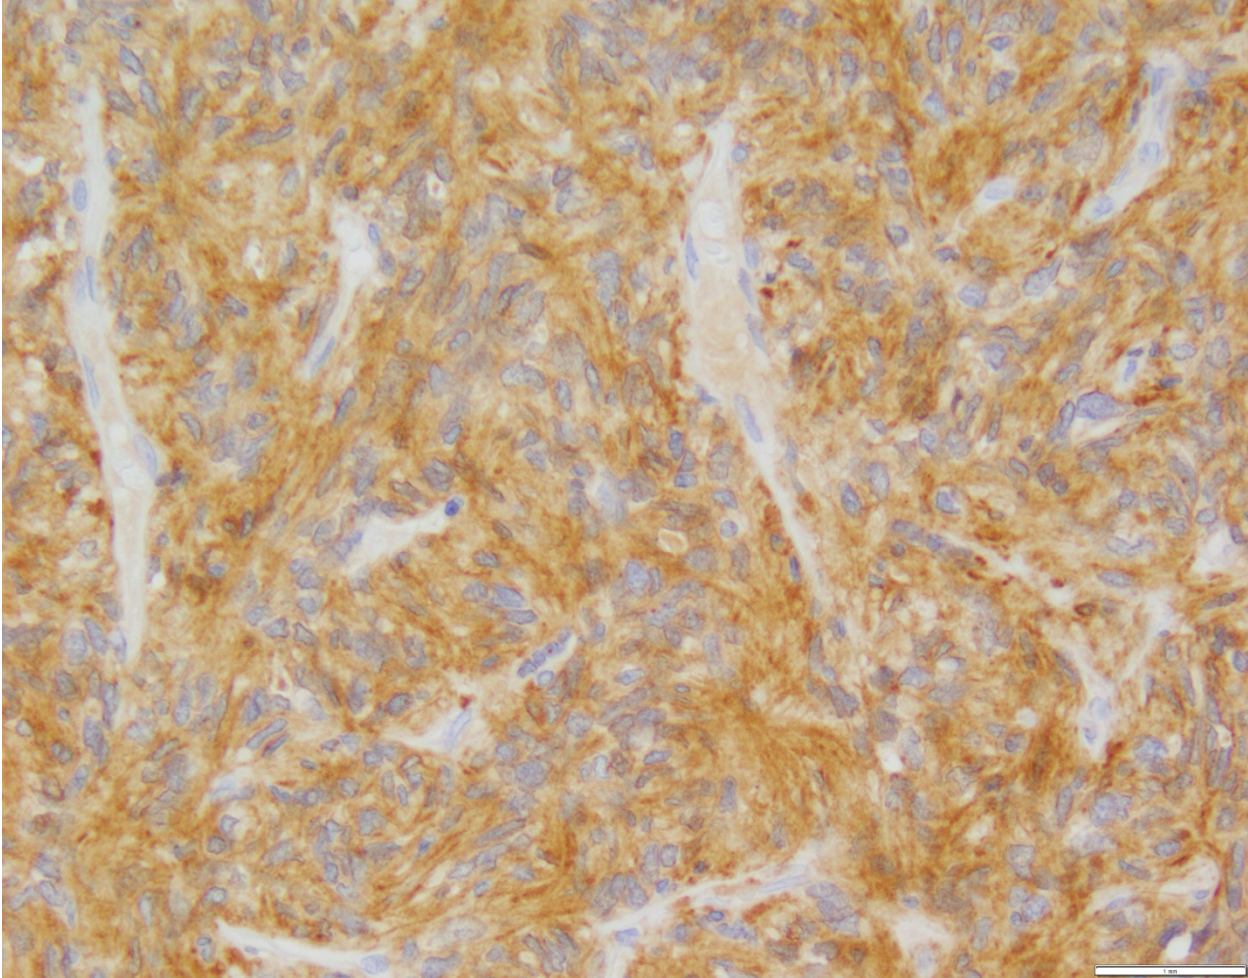

Supplement: NIHMS1552245-supplement-1.pdf [file NIHMS1552245-supplement-1.pdf]
